# Supplementary material for: Functional Analysis of Promoters from Three Subtypes of the PI3K Family and Their Roles in the Regulation of Lipid Metabolism by Insulin in Yellow Catfish Pelteobagrus fulvidraco
Source: PubMed Central journal article supplement (PMC5796211; doi:10.3390/ijms19010265), 2018-01-16
Supplement: ijms-19-00265-s001.pdf [file ijms-19-00265-s001.pdf]

Table 1. Primers used for PI3KCa, PI3KC2b, and PI3KC3 promoter cloning

| Gene             | Forward primer (5'-3')                    | Reverse primer (5'-3')                     | Step                          |                 |
|------------------|-------------------------------------------|--------------------------------------------|-------------------------------|-----------------|
| <i>PI3KCa</i>    | GTCTGTCGTTGCTATGG<br>AGAGC                | CCATAGAGCAGTTTCAG<br>GGTA                  | RT-PCR                        |                 |
|                  | ACGATGGACTCCAGAG<br>CGGCCGCVVNVNNCC<br>AA | GAGTGTCCAAGCGAAAT<br>AGTAAATACG            | Hitail-<br>PCR1               |                 |
|                  | ACGATGGACTCCAGAG                          | TTTCTGTTGAGTAATCCG<br>CTCTCGTG             | Hitail-<br>PCR2               |                 |
|                  | ACGATGGACTCCAGAG                          | CATGGTCGTTTAATCCAG<br>GAATGAAGA            | Hitail-<br>PCR3               |                 |
|                  | <i>PI3KC2b</i>                            | CGCTGAACTGAGAATCT<br>CGA                   | TTGATCTGCGGTCCTTAT<br>GA      | RT-PCR          |
|                  |                                           | ACGATGGACTCCAGAG<br>CGGCCGCBDBNBNCCG<br>GT | ATCACACATGGGTTCTAA<br>CAACTGC | Hitail-<br>PCR1 |
| ACGATGGACTCCAGAG |                                           | ACGACGCTTAAATTCCGC<br>ACTGTATA             | Hitail-<br>PCR2               |                 |
| ACGATGGACTCCAGAG |                                           | GAAGGTTTTTCGGTTTGT<br>GCTTTCAG             | Hitail-<br>PCR3               |                 |
| <i>PI3KC3</i>    |                                           | ATCGATTGCTTATGCCT<br>GTT                   | CCAGGTCGCAACTGTAA<br>ACAT     | RT-PCR          |
|                  | ACGATGGACTCCAGAG<br>CGGCCGCBNBNNGGT<br>T  | GCAGATATTCCTCAGAC<br>TTTGACACA             | Hitail-<br>PCR1               |                 |
|                  | ACGATGGACTCCAGAG                          | CACGGTGATTTTATACGG<br>TGTGTGACTTTA         | Hitail-<br>PCR2               |                 |
|                  | ACGATGGACTCCAGAG                          | ACAACCTGACTGGAGATG<br>GACACGGAC            | Hitail-<br>PCR3               |                 |

Table 2. Primers used for 5'-deletion plasmids construction

| Primers        | Forward primer (5'-3')                      | Reverse primer (5'-3')                     |
|----------------|---------------------------------------------|--------------------------------------------|
| <i>PI3KCa</i>  |                                             |                                            |
| pGl-360/+71    | ctatcgataggtaccgagctcGCAA<br>TCTAAGCAATTTAT | cagtaccggaatgccaagGCTTGATG<br>GAGACGCTA    |
| pGl-224/+71    | ctatcgataggtaccgagctcAAAA<br>GGAATCTGGATGC  | cagtaccggaatgccaagGCTTGATG<br>GAGACGCTA    |
| pGl-86/+71     | ctatcgataggtaccgagctcATTTG<br>TGTCGCATTACG  | cagtaccggaatgccaagGCTTGATG<br>GAGACGCTA    |
| <i>PI3KC2b</i> |                                             |                                            |
| pGl-1848/+79   | ctatcgataggtaccgagctcGGCA<br>GTTGAGCCAGCA   | cagtaccggaatgccaagcttTCGCAG<br>AAGGTTTTTCG |
| pGl-1522/+79   | ctatcgataggtaccgagctcCTGC                   | cagtaccggaatgccaagcttTCGCAG                |

|               |                                               |                                             |
|---------------|-----------------------------------------------|---------------------------------------------|
|               | CGGTGGTCTTCTTCCA                              | AAGGTTTTTCG                                 |
| pGl-1263/+79  | ctatcgataggtaccgagctcCATG<br>GATTCAAATCCTT    | cagtaccggaatgccaaagcttTCGCAG<br>AAGGTTTTTCG |
| pGl-929/+79   | ctatcgataggtaccgagctcGCAC<br>TACCATGCACTTCTC  | cagtaccggaatgccaaagcttTCGCAG<br>AAGGTTTTTCG |
| pGl-623/+79   | ctatcgataggtaccgagctcTCCCC<br>AGATGAAGTTCCC   | cagtaccggaatgccaaagcttTCGCAG<br>AAGGTTTTTCG |
| pGl-388/+79   | ctatcgataggtaccgagctcAGGG<br>TTTCAATATCG      | cagtaccggaatgccaaagcttTCGCAG<br>AAGGTTTTTCG |
| pGl-144/+79   | ctatcgataggtaccgagctcCACG<br>ACAAAAGAAAGCATC  | cagtaccggaatgccaaagcttTCGCAG<br>AAGGTTTTTCG |
| pGl-94/+79    | ctatcgataggtaccgagctcAAAT<br>CTCTGATCCGAGC    | cagtaccggaatgccaaagcttTCGCAG<br>AAGGTTTTTCG |
| <i>PI3KC3</i> |                                               |                                             |
| pGl-367/+59   | ctatcgataggtaccgagctcTGGT<br>GCTATGTGTTAAAG   | cagtaccggaatgccaaagCATAGTGC<br>GTTTCCCGA    |
| pGl-291/+59   | ctatcgataggtaccgagctcCATA<br>CTTTCACATGAAAAGC | cagtaccggaatgccaaagCATAGTGC<br>GTTTCCCGA    |
| pGl-85/+59    | ctatcgataggtaccgagctcGCGG<br>CTCTAAATCTCT     | cagtaccggaatgccaaagCATAGTGC<br>GTTTCCCGA    |

Table.3 Primers used for site-mutation analysis

| Primers           | Forward primer (5'-3')                                        | Reverse primer (5'-3')                               |
|-------------------|---------------------------------------------------------------|------------------------------------------------------|
| aMut-<br>HNF1-1   | TAAAAGgggggAAAAAATTT<br>ATATCAGATCCAGAGTTTG                   | TTTTTtccccCTTTTAATAAA<br>AAAAAGAAAACCTTATATTC<br>AAG |
| aMut-<br>HNF1-2   | AATTATGgggAAGCTCCATTA<br>AAAGGAATCTGGA                        | GGAGCTTcccCATAATTCATA<br>GTCTGACATTATGACTGAA         |
| 2bMut-<br>FOXO1-1 | TTTGTGggggCACACAAACAG<br>GCTCACAAATGC                         | TTTGTGTGccccCACAAACA<br>GTGACCAGTTGCGC               |
| 2bMut-<br>FOXO1-2 | ATTCAGTAgggggAAGCCATGG<br>TTCACAGCCAA                         | GCTTccccTACTGAATTTAC<br>GGAAGGATTTGAAT               |
| 2bMut-<br>FOXO1-3 | AAACTGgggggACTTCGACAT<br>GCCAAGGAAGAT                         | CGAAGTccccCAGTTTGGCT<br>GTGAACCATGG                  |
| 2bMut-<br>FOXO1-4 | TTGTACgggggCAATACTGTTA<br>TTTGCACACTACCATGC                   | GTATTGccccGTACAATATG<br>CAGCAGCAGCAGT                |
| 2bMut-<br>IK1     | ATGAAgggggATGGAAAGTTT<br>CCGGCCCCTT                           | TTCCATccccTTCATCTGGG<br>GAGAGCTCGG                   |
| 3Mut-<br>FOXO1-1  | AAAGTAggggAGAAAACCTTT<br>AAAAATTCTAAGCTAAGAT                  | GGTTTTCTcccTACTTTAAC<br>ACATAGCACCAGAGCTCG           |
| 3Mut-<br>FOXO1-2  | GACTTATTAGATggggTATTAA<br>TTCAAATACAATTAATAATA<br>TGAATAATAAA | TAccccATCTAATAAGTCATA<br>GTTTAAACTAGAATGTGTT<br>G    |

|                  |                                      |                                                             |
|------------------|--------------------------------------|-------------------------------------------------------------|
| 3Mut-<br>FOXO1-3 | TAAgggggACATAAAGGACTG<br>AGACGGGGTGA | CCTTTATGTccccTTATTATT<br>CATATTATTTAATTGTATTTG<br>AATTAATAA |
|------------------|--------------------------------------|-------------------------------------------------------------|

Table 4 Primers used for electrophoretic mobility-shift assay

| Primers                 | Forward primer (5'-3')               | Reverse primer (5'-3')              |
|-------------------------|--------------------------------------|-------------------------------------|
| B-PI3KCa-<br>HNF1       | TATGA <u>AATT</u> TATGTAAAGC<br>TCCA | TGGAGCTTTAACATA <u>AATTCAT</u><br>A |
| Mut-PI3KCa-<br>HNF1     | TATGGGGTATGTAAAG<br>CTCCA            | TGGAGCTTTAACATA <u>CCCCAT</u><br>A  |
| B-PI3KC2b-<br>FOXO1-1   | CACTGTTTGTGA <u>ACACA</u><br>CACAA   | TTGTGTG <u>TGTT</u> CACAAACAG<br>TG |
| Mut-PI3KC2b-<br>FOXO1-1 | CACTGTTTGTGGGGGCA<br>CACAA           | TTGTGTG <u>CCCC</u> CACAAACAG<br>TG |
| B-PI3KC2b-<br>FOXO1-2   | GCCAAACTG <u>AAAAA</u> AC<br>TTCGAC  | GTCGAAGT <u>TTTTT</u> CAGTTTG<br>GC |
| Mut-PI3KC2b-<br>FOXO1-2 | GCCAAACTGGGGGGAC<br>TTCGAC           | GTCGAAGT <u>CCCCC</u> CAGTTTG<br>GC |
| B-PI3KC2b-<br>FOXO1-3   | TGTACA <u>AAAA</u> CAATACT<br>GTTAT  | ATAACAGTATTG <u>TTTTT</u> GTAC<br>A |
| Mut-PI3KC2b-<br>FOXO1-3 | TGTACGGGGGCAATACT<br>GTTAT           | ATAACAGTATTG <u>CCCCC</u> GTAC<br>A |
| B-PI3KC2b-<br>IK1       | CAGATGAAGT <u>TCCC</u> ATG<br>GAA AG | CTTTCCATGGGA <u>ACTTCATCT</u><br>G  |
| Mut-PI3KC2b<br>-IK1     | CAGATGAAGGGGGGATG<br>GAA AG          | CTTTCCAT <u>CCCCC</u> CTTCATCT<br>G |
| B-PI3KC3-<br>FOXO1      | TATTAGAT <u>TGTTT</u> TAT<br>TAATTCA | TGAATTAATA <u>ACAATCTAAT</u><br>A   |
| Mut-PI3KC3-<br>FOXO1    | TATTAGATGGGGTAT<br>TAATTCA           | TGAATTAATA <u>CCCCATCTAAT</u><br>A  |

Table 5. Primers used for q-PCR from yellow catfish

| Primers        | Forward primer (5'-3')   | Reverse primer (5'-3')    |
|----------------|--------------------------|---------------------------|
| $\beta$ -Actin | GGACTCTGGTGATG<br>GTGTGA | CTGTAGCCTCTCTCG<br>GTCAG  |
| 18srRNA        | CTGCCGGTGGTCTTC<br>TTCCA | ATTCAGCGGGTCGTC<br>TCGTC  |
| RPL17          | GGCAAATGTACAGGA<br>GCGAG | GCCTTGTTGAGCTTG<br>ACGAA  |
| GAPDH          | TTTCAGCGAGAGAGA<br>CCCAG | ATGACTCTCTTGGA<br>CCTCC   |
| HPRT           | ATGCTTCTGACCTGG<br>AACGT | TTGCGGTTTCAGTGCT<br>TTGAT |

|               |                               |                                      |
|---------------|-------------------------------|--------------------------------------|
| UBCE          | TCAAGAAGAGCCAGT<br>GGAGG      | TAGGGGTAGTCGATG<br>GGGAA             |
| TUBA          | TCAAAGCTGGAGTTC<br>TCGGT      | AATGGCCTCGTTATCCACC<br>A             |
| PI3KCa        | CCAGGGAAACGGGA<br>TACA        | TCCACTTTACAGCAAGGAG<br>AA            |
| PI3KCb        | CTGATGCTGACTTCTG<br>GGTTA     | TTATGGAGGTGTTAGGAGG<br>GA            |
| PI3KCg        | CCGATTTTGTCTGAG<br>GGT        | TTCTCCACTTTTCAGGCAC<br>T             |
| PI3KCd        | GACACCCAAAAGAAC<br>CACG       | TTCCCACATTGAGCCACC                   |
| PI3KC2a       | TGAATCAGAACCCAAG<br>AAGAAG    | GGATGCGAAATGTAACGGA                  |
| PI3KC2b       | GCGGAATTTAAGCGTC<br>GTC       | GGGGATTTGGAGGGATAAG<br>A             |
| PI3KC3        | AAAGCAGGCACTGGA<br>GTTATT     | GCGTAGCGTCTGACTGTAG<br>G             |
| FAS           | AACTAAAGGCTGCTGGTTGC<br>TA    | CACCTTCCCGTCACAAACC<br>TC            |
| G6PD          | CAGGAATGAACGCTGGGATG          | TCTGCTACGGTAGGTCAGG<br>TCC           |
| 6PGD          | GCTCTGATGTGGCGAGGTGG          | CGTAGAAGGACAGTGCAG<br>TGGTAAA        |
| CPT IA        | ATTTGAAGAAGCACCCAGAG<br>TATGT | CCCTTTTATGGACGGAGAC<br>AGA           |
| PPAR $\alpha$ | CGAGGATGGGATGCTGGTG           | CGTCTGGGTGGTTCGTCTG<br>C             |
| PPAR $\gamma$ | ACGCCCCGTTTCGTTATCC           | TGAGCAGAGTCACCTGGT<br>CATTG          |
| ACCa          | AATGGCTATGACTGGCAAGG<br>G     | TACCGTCGTTCCACTAGTG<br>ATT           |
| ACCb          | AAGTGCTGTCTGAGCCCTGG<br>AG    | CGCGGATCCTCCACTAGTG<br>ATTTCACTATAGG |
| ATGL          | TTGCGGAAATGTGATTGAGG<br>T     | CACGGAAGGCAGGAGGGA                   |
| LPL           | AGCGATTGGTGGGAGGATTA<br>T     | TGAGCACGGTCCAGTTTCC<br>T             |
| CD36          | GATCGTTCTGATTTTCGGTTG<br>G    | TTATTGTCGTACTIONTCGGCA<br>CTG        |
| FABP          | GAAAGTGGACCGCAATGAG<br>A      | GTCAGTGTTTTGCCGTTGT<br>CTT           |

---

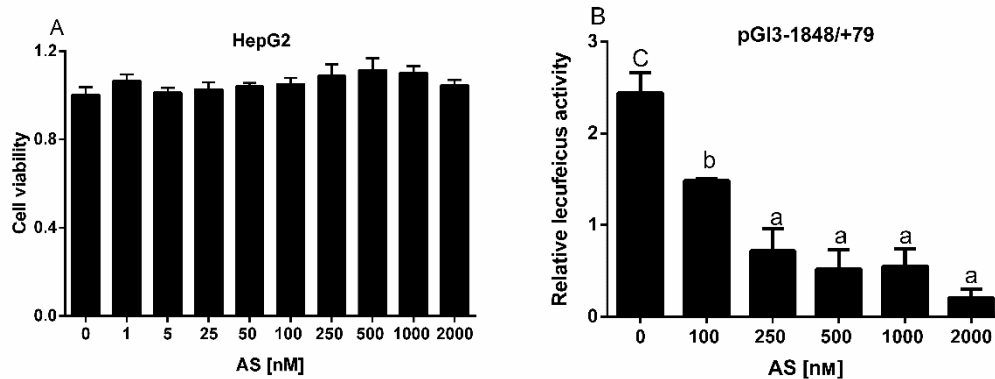

Fig.1. (A) Effects of AS1842856 (AS) on cell viability on HepG<sub>2</sub> cells, and no significant differences were found on the cell viability after incubation for 24 h. (B) Effects of AS on the relative luciferase activity of pGI3-1848/+79 of PI3KC2b-vectors in HepG<sub>2</sub> cells. Values are expressed as means+s.e.m. (N=3). Different letters indicate significant differences among groups (P<0.05).

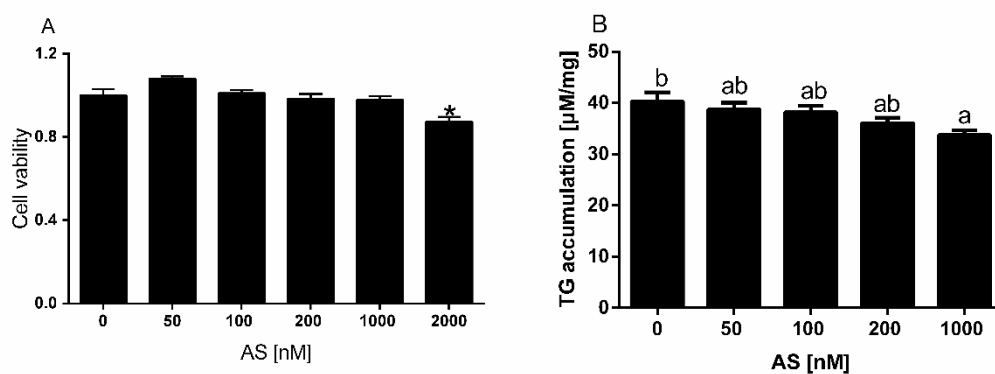

Fig.2 (A) Effects of AS on cell viability on primary hepatocytes from yellow catfish after incubation for 48 h. (B) Effects of AS on triglyceride content in primary hepatocytes from yellow catfish. Symbol (\*) indicates significant differences between the treatment group and the control group (P<0.05).
